# Supplementary material
Source: ML conference proceedings conference paper supplement (https://proceedings.mlr.press/v164/zhao22a.html)
Supplement: Supplementary file 1 [file zhao22a-supp.zip]

Archive with 2 entries (2 files):
- ISSA_CoRL21_CameraReady_final_Appendix.pdf
- __MACOSX/._ISSA_CoRL21_CameraReady_final_Appendix.pdf
